# Supplementary material for: Pelargonidin Modulates Keap1/Nrf2 Pathway Gene Expression and Ameliorates Citrinin-Induced Oxidative Stress in HepG2 Cells
Source: PubMed Central journal article supplement (PMC5711834; doi:10.3389/fphar.2017.00868), 2017-11-27

**Supplementary:**

**Pelargonidin modulates Keap1/Nrf2 pathway gene expression and ameliorates citrinin-induced oxidative stress in HepG2 cells**

Sharath Babu G R<sup>1</sup>, Anand T<sup>1\*</sup>, Ilaiyaraja N<sup>1</sup>, Farhath Khanum<sup>1</sup>, Gopalan N<sup>2</sup>

<sup>1</sup>Biochemistry and Nano Sciences Division, Defence Food Research Laboratory, Mysuru-570011, Karnataka, India

<sup>2</sup>Food Biotechnology Division, Defence Food Research Laboratory, Mysuru-570011, Karnataka, India

**\*Corresponding author**

Biochemistry and Nano Sciences Division,  
Defence Food Research Laboratory,  
Mysuru-570011, Karnataka, India  
E-mail address: anand@dfrl.drdo.in  
Tel.: 0821-2579487; Fax: 0821-2473468

Figure S1 and S2 Original Western blots

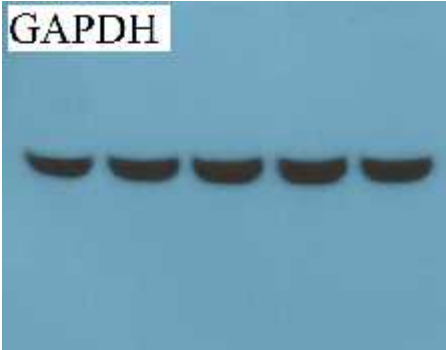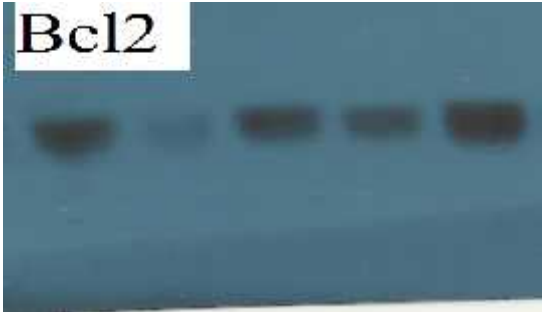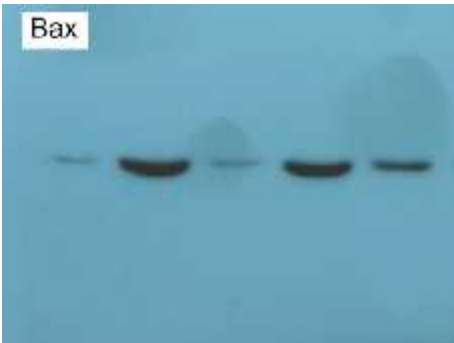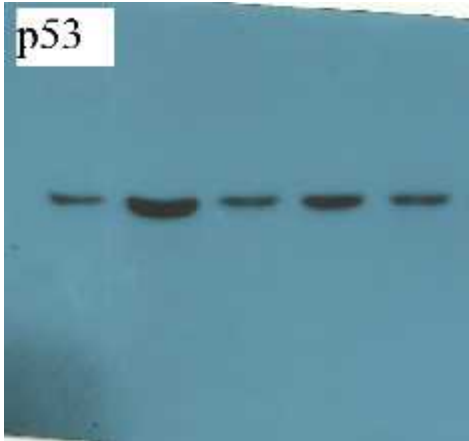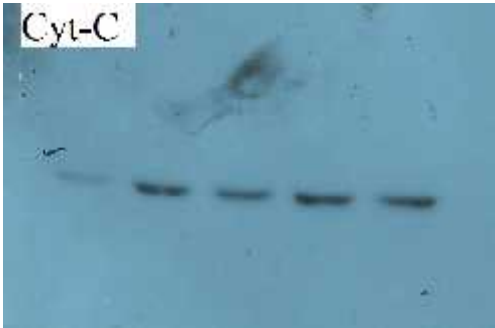

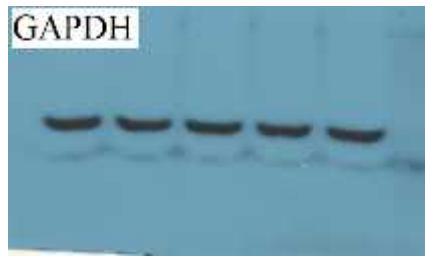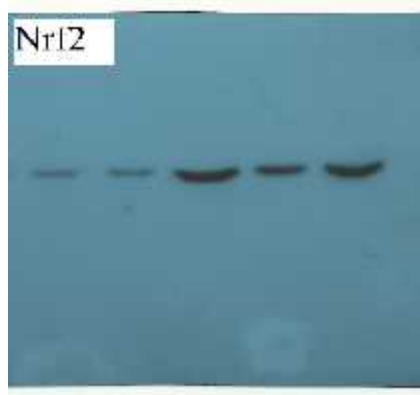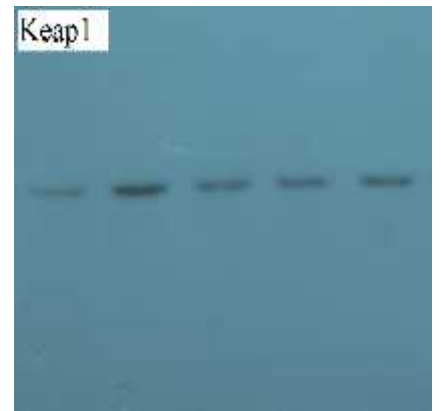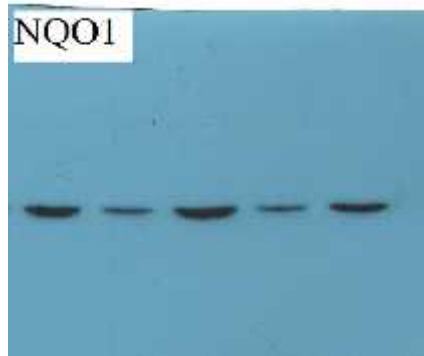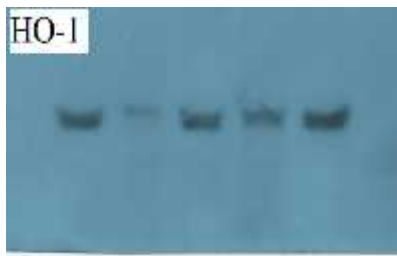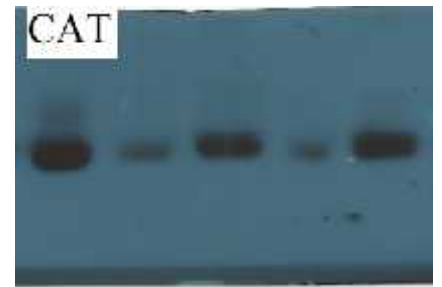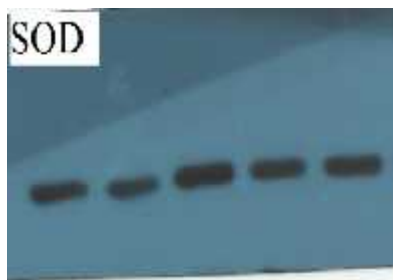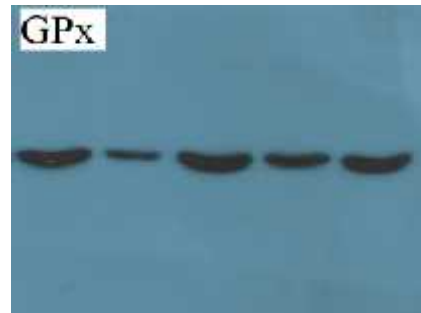

Supplement: Data_Sheet_1.pdf [file Data_Sheet_1.pdf]
